# Supplementary material
Source: PubMed Central journal article supplement (PMC3870480)

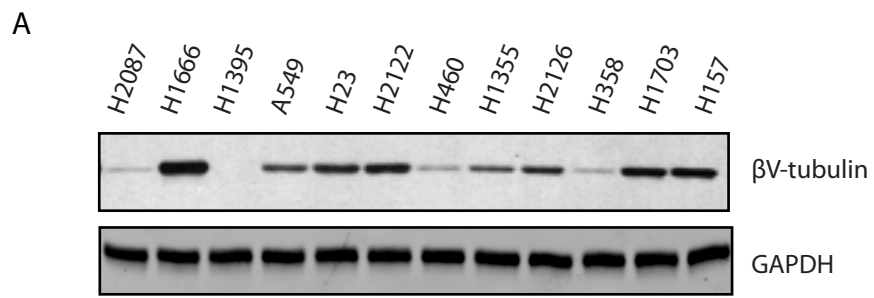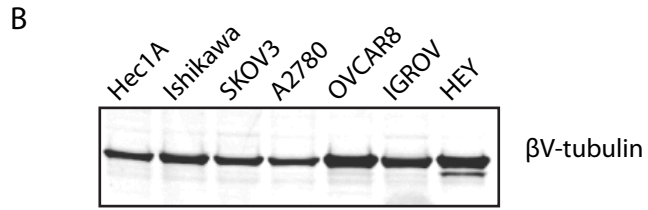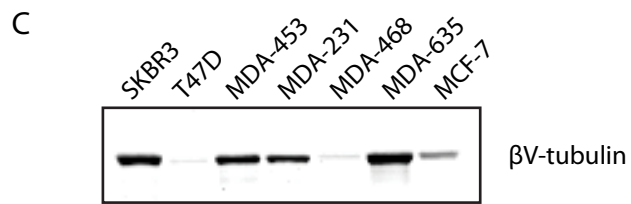

Supplement: NIHMS528433-supplement-Supp_Figure_S3.pdf [file NIHMS528433-supplement-Supp_Figure_S3.pdf]
